# Supplementary material for: Crystal structure of the ionic liquid EtNH3NO3—Insights into the thermal phase behavior of protic ionic liquids
Source: Royal Society of Chemistry journal article supplement (doi:10.1039/c2cp43079g), 2012-01-01
Supplement: c2cp43079g.pdf [file c2cp43079g.pdf]

# Crystal structure of the ionic liquid EtNH<sub>3</sub>NO<sub>3</sub>—Insights into the thermal phase behavior of protic ionic liquids

Wesley A. Henderson,<sup>\*a,b</sup> Paul Fylstra,<sup>a</sup> Hugh C. De Long,<sup>c</sup> Paul C. Trulove<sup>a</sup> and Simon Parsons<sup>d</sup>

<sup>a</sup> Department of Chemistry, U.S. Naval Academy, Annapolis, MD 21402, USA. Fax: 1-410-293-2218; Tel: 1-410-293-6622; E-mail: trulove@usna.edu

<sup>b</sup> Ionic Liquids & Electrolytes for Energy Technologies (ILEET) Laboratory, Department of Chemical & Biomolecular Engineering, NC State University, Raleigh, NC 27695-7905, USA. Fax: 1-919-515-3465; Tel: 1-919-513-2917; E-mail: whender@ncsu.edu

<sup>c</sup> U.S. Air Force Office of Scientific Research, Arlington, VA 22203, USA. Fax: 1-703-696-7360; Tel: 1-703-696-7722; E-mail: hugh.delong@afosr.af.mil

<sup>d</sup> School of Chemistry, University of Edinburgh, Edinburgh, Scotland EH9 3JJ. Fax: 0131 650 4743; Tel: 0131 650 5804; E-mail: s.parsons@ed.ac.uk

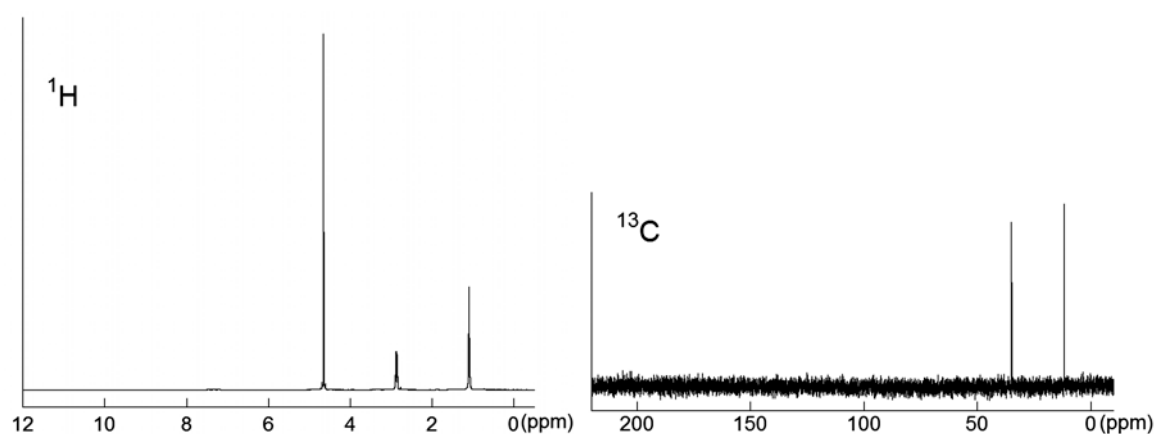

Figure S1. <sup>1</sup>H and <sup>13</sup>C NMR data for EtNH<sub>3</sub>NO<sub>3</sub> in CD<sub>3</sub>CN.

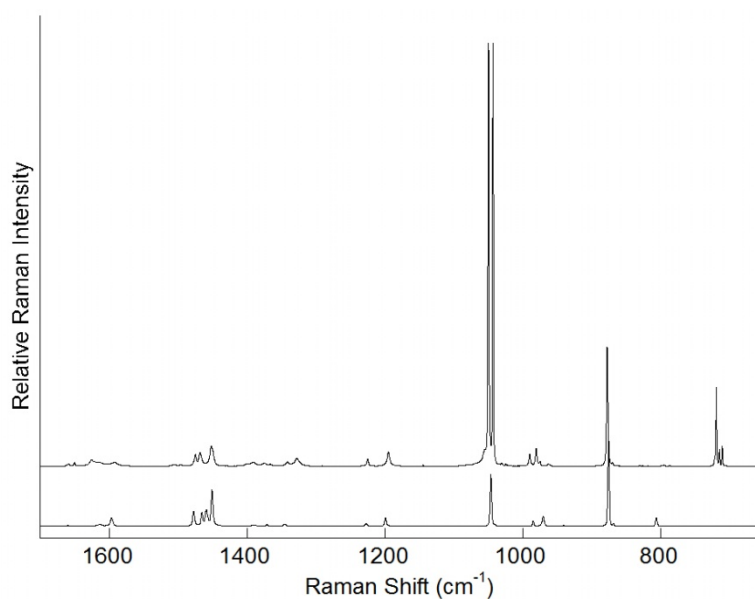

Figure S2. Raman spectra of (top) EtNH<sub>3</sub>NO<sub>3</sub> and (bottom) EtNH<sub>3</sub>Cl.
